# Supplementary material for: Global high-resolution fire-sourced PM 2.5 concentrations for 2000–2023
Source: Copernicus journal article supplement (doi:10.5194/essd-2024-414), 2024-10-21
Supplement: Supplementary file 1 [file essd-2024-414-supplement.pdf]

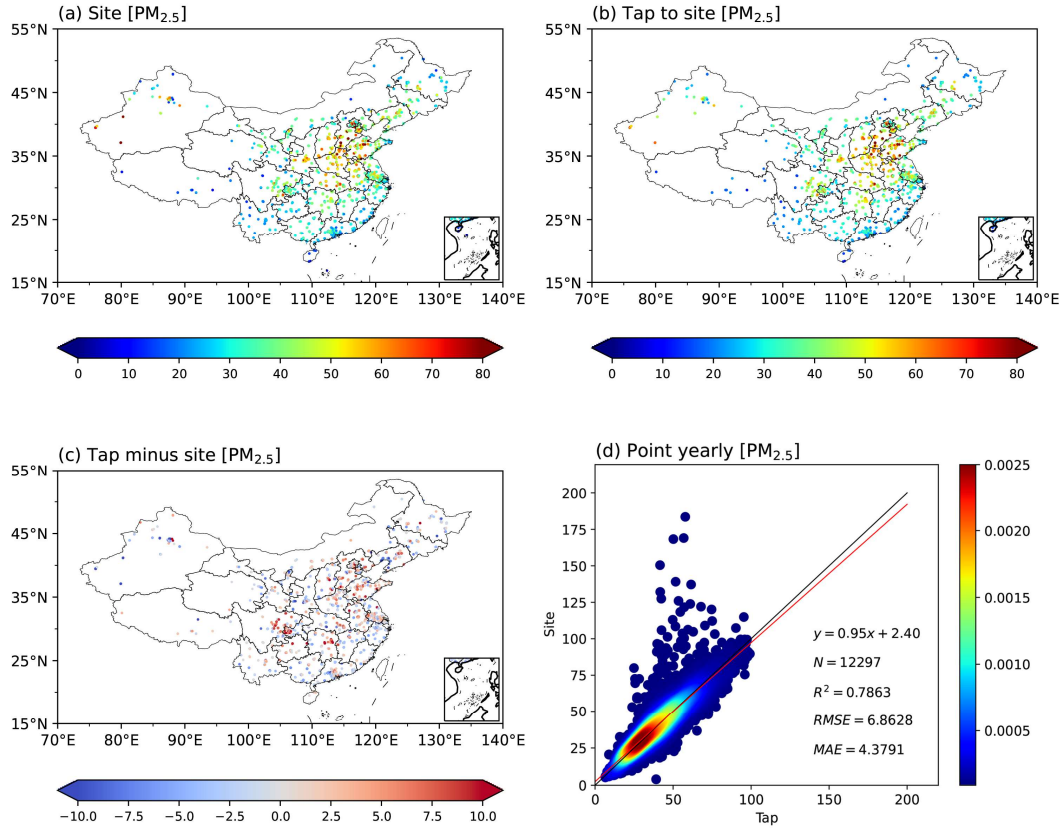

**Figure S1.** Comparison of observed and interpolated  $\text{PM}_{2.5}$  concentrations ( $[\text{PM}_{2.5}]$ ) in China from 2015 to 2022. Panel (a) displays annual mean  $[\text{PM}_{2.5}]$  ( $\mu\text{g m}^{-3}$ ) at 1822 monitoring sites. Panel (b) shows interpolated annual mean  $[\text{PM}_{2.5}]$  from Tracking Air Pollution (TAP) dataset. Panel (c) presents the difference between interpolated and observed values. Panel (d) compares annual mean  $[\text{PM}_{2.5}]$  at each site with observations, with colors indicating data frequency. Validation metrics, including sample size ( $N$ ), regression equation, determination coefficient ( $R^2$ ), root-mean-square error (RMSE), and mean absolute error (MAE) are also provided.

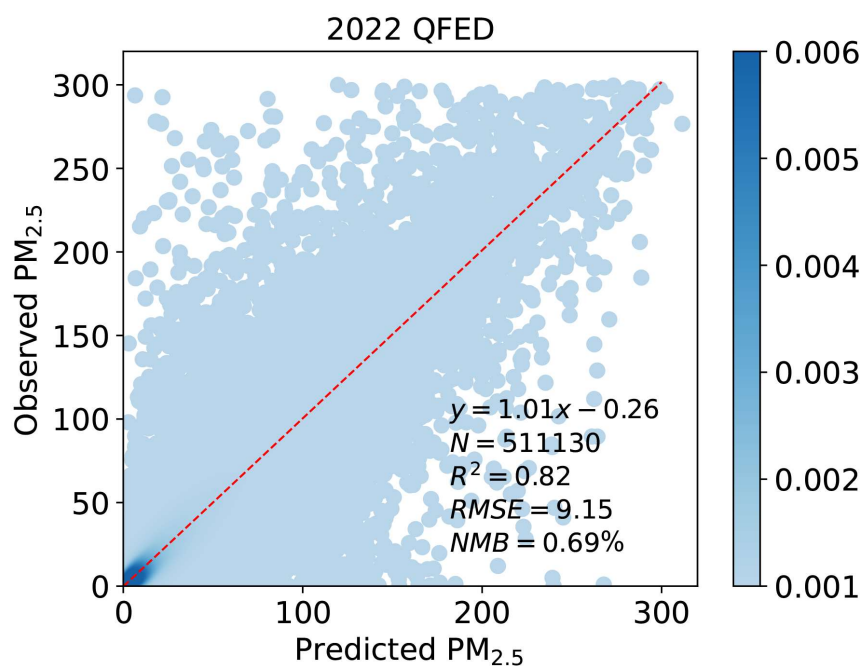

**Figure S2.** Same as Fig. 1b, but for GEOS-Chem simulations using the QFED inventory.

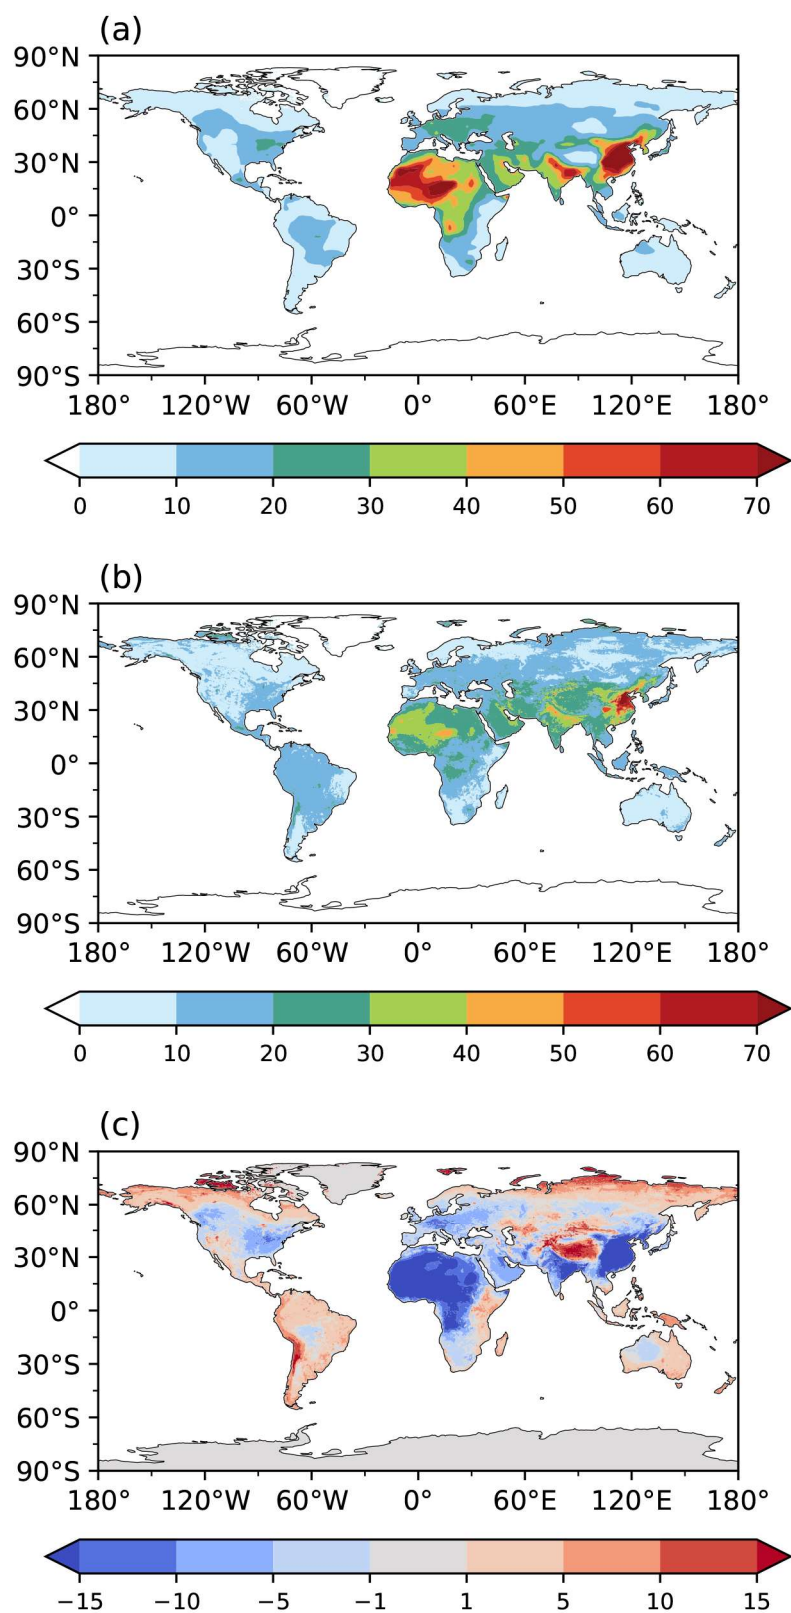

**Figure S3.** The same as Fig. 4 but with fire emissions from the QFED inventory.

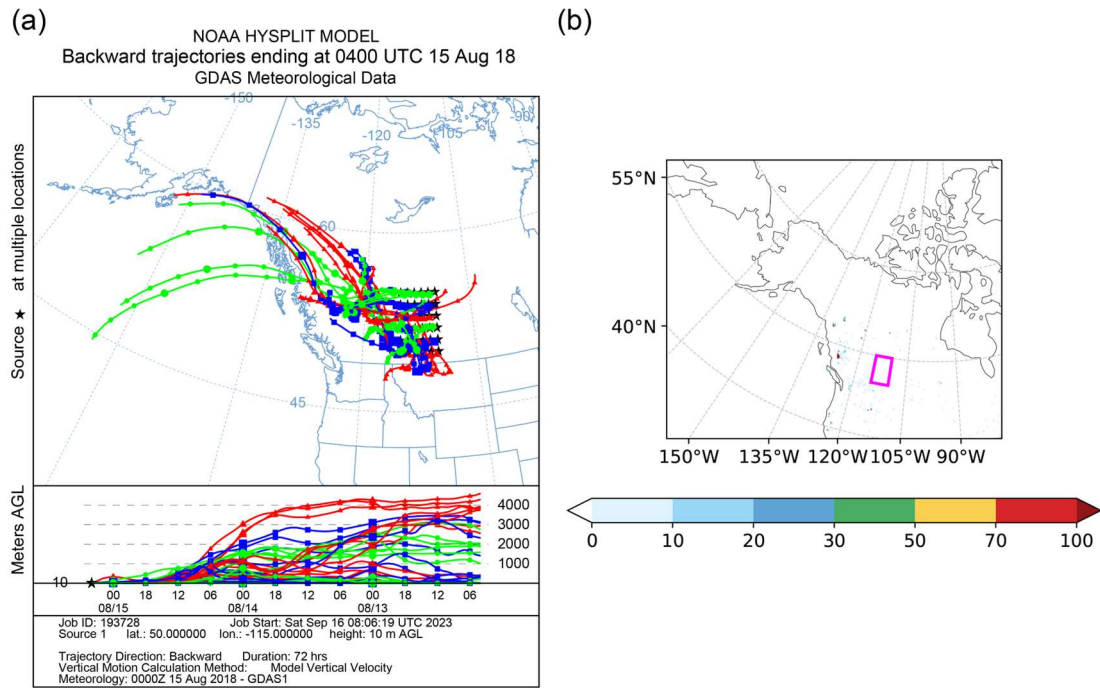

**Figure S4.** The 72-hour backward trajectories of Canadian sites ending on August 15<sup>th</sup>, 2018 , generated using the NOAA HYSPLIT Trajectory Model. The horizontal and vertical trajectories are shown in (a) and the fire emissions of GFED inventory averaged for August 13-15, 2018 are shown in (b). The pink box represents the range of sites in Canada.

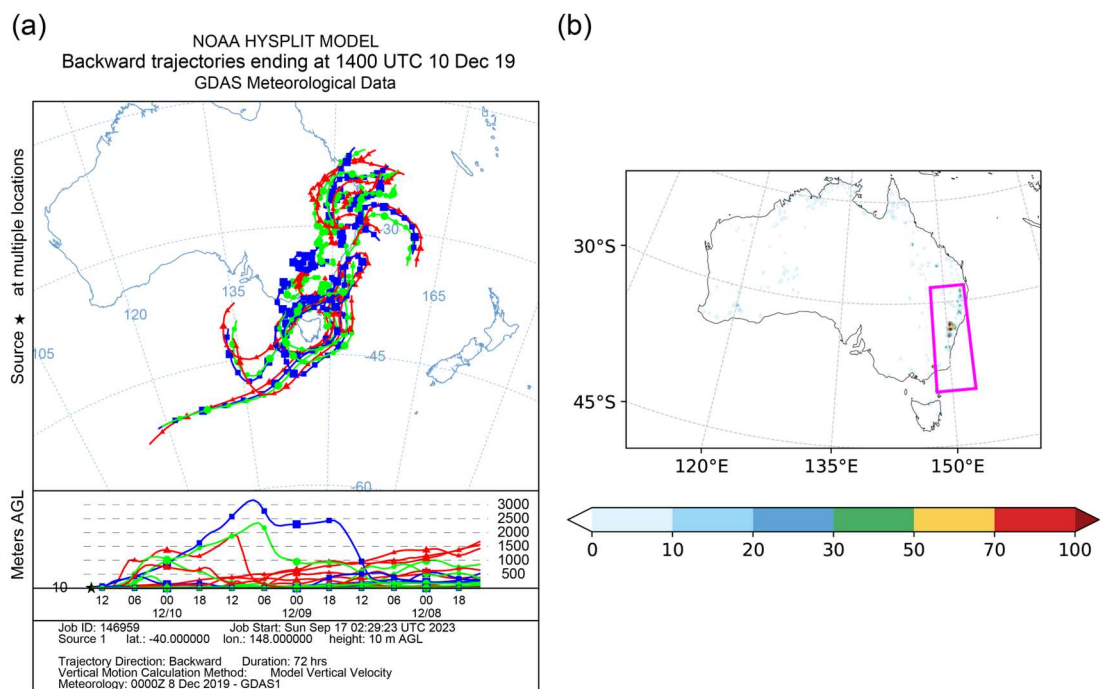

**Figure S5.** The same as Fig. S4 but for the backward trajectories of Australian sites ending on December 10<sup>th</sup>, 2019.

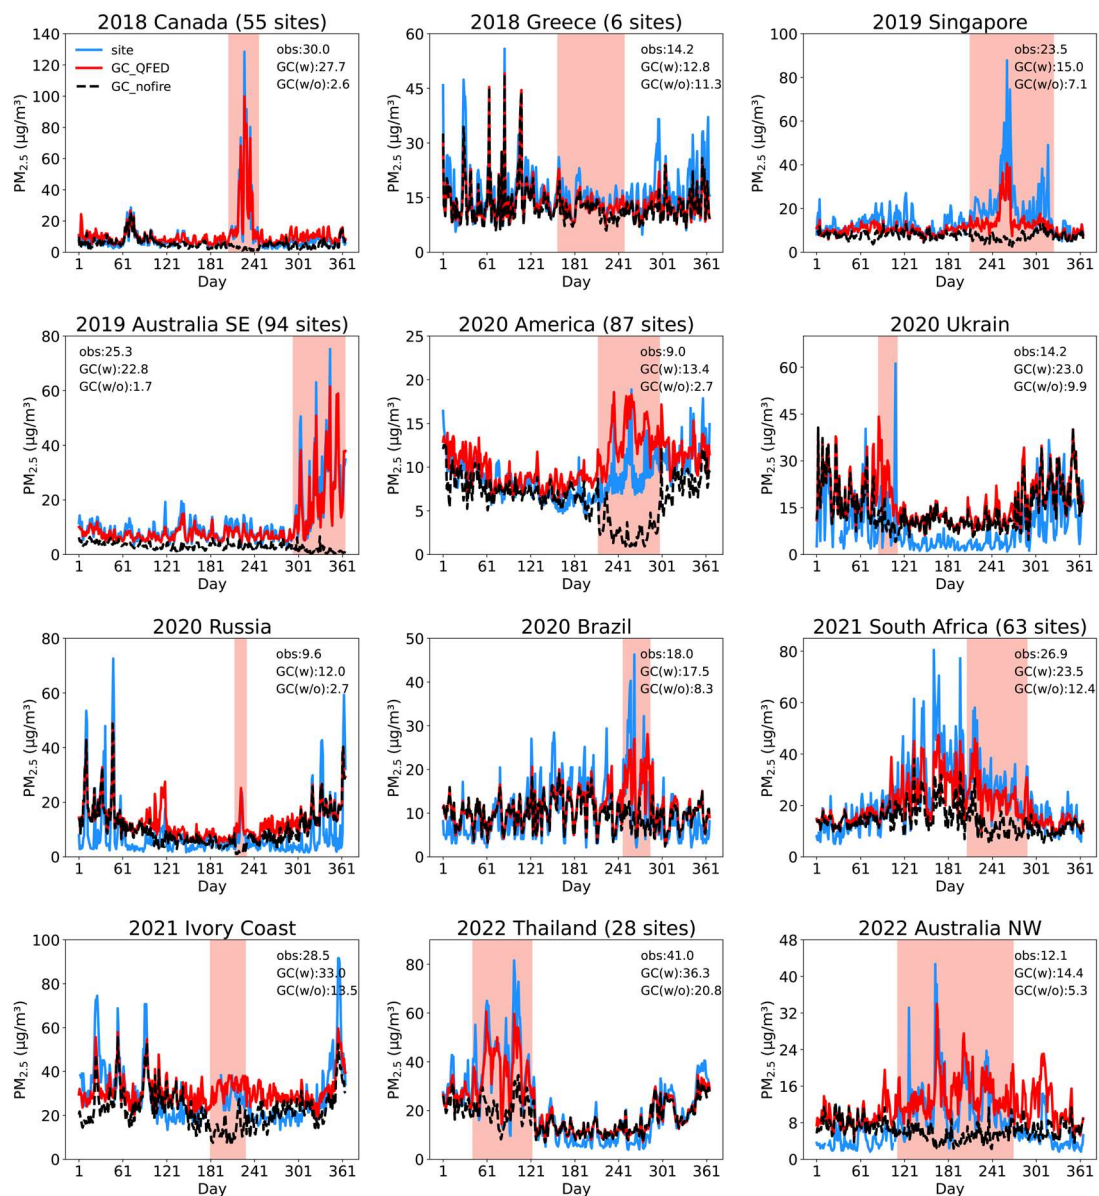

**Figure S6.** The same as Fig. 5 but the simulated  $[PM_{2.5}]$  is derived using QFED fire emission inventory.



Global

2000 - 2023 Max

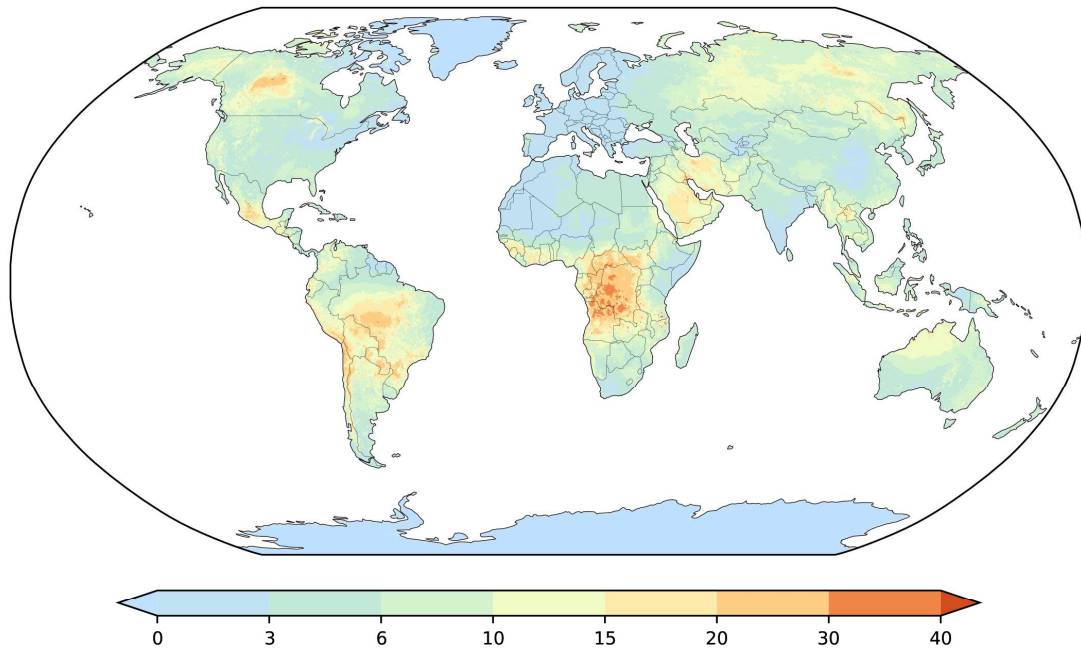

Canada

5.2 (2023)

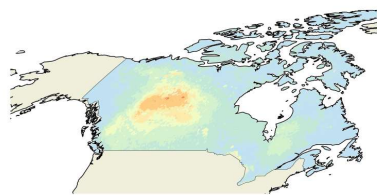

Brazil

4.5 (2022)

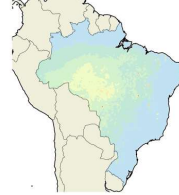

Siberia

4.6 (2019)

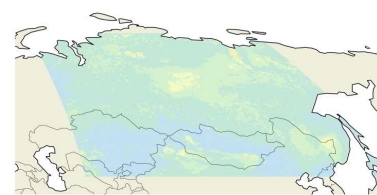

**Figure S7.** The same as Fig. 8 but with fire emissions from the QFED inventory.

**Table S1** Summary of the input for machine learning model

| Variables  | Descriptions                                                     |
|------------|------------------------------------------------------------------|
| GC_GFED    | Simulated [PM <sub>2.5</sub> ] by GEOS-Chem using GFED emissions |
| GC_QFED    | Simulated [PM <sub>2.5</sub> ] by GEOS-Chem using QFED emissions |
| BLH        | Boundary layer height                                            |
| Pc         | Convective precipitation                                         |
| Pls        | Large scale precipitation                                        |
| Pt         | Total precipitation                                              |
| T2M        | 2m temperature                                                   |
| T2X        | Maximum 2m temperature since previous post processing            |
| T2N        | Minimum 2m temperature since previous post processing            |
| RH         | Relative humidity                                                |
| SP         | Surface pressure                                                 |
| SRD        | Surface solar radiation downwards                                |
| T500       | Temperature 500hPa                                               |
| T850       | Temperature 850hPa                                               |
| TCC        | Total cloud cover                                                |
| V10M       | Wind speed at 10m                                                |
| V500       | Wind speed at 500hpa                                             |
| V850       | Wind speed at 850hpa                                             |
| F_Water    | The cover fraction of Water                                      |
| F_ENF      | The cover fraction of Evergreen Needleleaf Forest                |
| F_EBF      | The cover fraction of Evergreen Broadleaf Forest                 |
| F_DNF      | The cover fraction of Deciduous Needleleaf Forest                |
| F_DBF      | The cover fraction of Deciduous Broadleaf Forest                 |
| F_Mforest  | The cover fraction of Mixed Forests                              |
| F_Cshrub   | The cover fraction of Closed Shrubland                           |
| F_Oshrub   | The cover fraction of Open Shrubland                             |
| F_Wsavanna | The cover fraction of Woody Savannas                             |
| F_savanna  | The cover fraction of Savannas                                   |
| F_grass    | The cover fraction of Grasslands                                 |
| F_Pwetland | The cover fraction of Permanent Wetlands                         |
| F_crop     | The cover fraction of Croplands                                  |
| F_urban    | The cover fraction of Urban and Built-up                         |
| F_CVM      | The cover fraction of Cropland/Natural Vegetation Mosaic         |
| F_snow     | The cover fraction of Snow and Ice                               |
| F_barren   | The cover fraction of Barren or Sparsely Vegetated               |



**Table S2** Spatiotemporal information of wildfire episodes

| Event             | Region             | Time            |
|-------------------|--------------------|-----------------|
| 2018 Canada       | British Columbia   | 2018.7-2018.8   |
| 2018 Greece       | Athens             | 2018.6-2018.8   |
| 2019 Singapore    | Sumatra            | 2019.8-2019.11  |
| 2019 Australia SE | New South Wales    | 2019.10-2019.12 |
| 2020 Ukrain       | Chernobyl          | 2020.3-2020.4   |
| 2020 Russia       | Siberia            | 2020.8          |
| 2020 Brazil       | Sao Paulo          | 2020.9-2020.10  |
| 2021 Ivory Coast  | Yamoussoukro       | 2021.7-2021.9   |
| 2021 South Africa | Limpopo            | 2021.7-2021.10  |
| 2022 Australia NW | Northern Territory | 2022.4-2022.9   |
| 2022 Thailand     | Lampang            | 2022.4-2022.5   |
